# Supplementary material
Source: PubMed Central journal article supplement (PMC3133030)
Supplement: supp_193_8_2035__1.pdf [file supp_193_8_2035__1.pdf]

Supplemental Table 1: List of intein sequences used in the phylogenetic analysis

|                         | 1                                                   | 10 | 20 | 30 | 40 | 50 |
|-------------------------|-----------------------------------------------------|----|----|----|----|----|
| Aae_RIR2_T1C            | CFIEGTEVLTKRGNWEVVATEGHEFIVKVYCVSVPKGNIVVSVCIAGNC   |    |    |    |    |    |
| Aave_Aave1721_T1C       | CVDDTTEALTQRGTLDMMLTPDHRVVHRVWCPIVGTSTWVAMPFITHTNT  |    |    |    |    |    |
| Ccy_Hyp_Csp1_T1C        | CFTGDTLIPLVDGGEEIKCTPDHOFMLDVYCLTVPEYNNFAAGVVFVHNC  |    |    |    |    |    |
| Ceu_ClpP_T1C            | CLTSDHTVLTTRGGVDLFTPNHRMYVPVYCLTG-PNNVFYKAVWTGNS    |    |    |    |    |    |
| Cme_boo_Pol_II_T1C      | CFYGETKIEIFDGRVTDTNNGMHLRIRVYCLTVAEDHTLVNGVFTGQC    |    |    |    |    |    |
| Cmo_ClpP_T1C            | CLTSDHTVLTTRGGVDLFTPNHRMYVPVYCLTV-PNSVFYKAVWTGNS    |    |    |    |    |    |
| Cmo_RPB2_T1C            | CLTPDHDVLTTKGNINLLVTPNHRMYIPVFCLTV-PNEVFYIPVWTGNS   |    |    |    |    |    |
| Cpa_ThrRS_T1C           | CLSEDMRIQTDKGGVSLLVTEHDHMYVRVWCVTVPPTGLIVAKPVVIGNC  |    |    |    |    |    |
| Cre_RPB2_T1C            | CLSEEHQVLTNEGGLSLVVTTPGHDMYLRTWCVSL-P-HTYILPTILGNC  |    |    |    |    |    |
| Cst_RPB2_T1C            | CLTPSHEVLTENGEIELOVTOEHYMWVSVHCVEVPEPHLFYKGVWTGNS   |    |    |    |    |    |
| Ctr_ThrRS_T1C           | CLSEDMRVQTNKGSFSLFVTDNHDHMYVRVWCVTVPPTGLIIVRPTIVGNC |    |    |    |    |    |
| Fte_RPB2_T1C            | CLTPDHDVLTAEGNLSLLVTLNHRMYVKVFCLSV-PNEVFYLPVWTGNS   |    |    |    |    |    |
| Hma_Pol_II_T1C          | CFHPDTRLWYEDEDRTLRTVTPDHTMLRHVYCLTVADTHRAEGTYVGQC   |    |    |    |    |    |
| Hma_PolB_T1C            | CFTPDTDVLTPPEGKMDFRVTPNHRMLVGVYCVTVADNHTLMKFQFVGQS  |    |    |    |    |    |
| Hmu_PolB_T1C            | CFTPDTDEVVTPPEGKIDFRVTPNHRMLVGVHCVTVEDNHTLLKFQFVGQS |    |    |    |    |    |
| Hwa_Pol_II_1_T1C        | CFHPETKIWFRTDGREITITPDHEMHIYTYCLTVSETHSLINDLSQKQC   |    |    |    |    |    |
| Hwa_PolB2_T1C           | CFTPDTNVLTPNGEIDFRVTPNHRMLVGVYCVTVADNQTLLTFQWTGNS   |    |    |    |    |    |
| Lsp_GyrB_T1C            | CFTGDTLVLPLADGGAEIKCTPDHOFMLDVYCLTVPEYHNFADGVVFVHNC |    |    |    |    |    |
| Memar_MCM2_T1C          | CYDDETEVLTESGQVDLAVTPNHRMYVTIYCLEVPNHTLYVIPVWCGNS   |    |    |    |    |    |
| Memar_Pol_II_T1C        | CFAGDTEITVSDGGRVLTVPDPHAMLVRVYCLTVAENHTLVNGIFCGQC   |    |    |    |    |    |
| Mhu_Pol_II_T1C          | CFHGDTLIEIYADGKNLLVTPDHAMLVRVYCLTVDRDHNVNNGIFTGQC   |    |    |    |    |    |
| Nma_PolB2_T1C           | CFTPDTDEVLTDPDGKIDFRVTPNHRMLVGVYCVTVEDNHTLLKFQFVGQS |    |    |    |    |    |
| Nph_PolB2_T1C           | CFTPDTDEVLTDPGEIDFRVTPNHRMLVGVYCVTVEDNHTLLKFQFVGQS  |    |    |    |    |    |
| Npu_GyrB_T1C            | CFIGDTLIPLADGGEEI ICTPDHOFMLDVYCLTVPEYHNFAGVVFVHNC  |    |    |    |    |    |
| Sas_RPB2_T1C            | CLTPDHEVLTERGHVSLITTPNHRMWTKVHCIEV-PGHVFYKAVWTGNS   |    |    |    |    |    |
| She_RpoB_T1C            | CLTVDHEVLTTKGNLDDLVTNHRMYVAVYCLSV-PNEIFYLSVWTGNS    |    |    |    |    |    |
| Sru_RIR1_T1C            | CLTGDQRVVTDRGGVEQKVSARHGMPVTVYCPPTTEESVFVQALTFNC    |    |    |    |    |    |
| Ter_Ndse1_T1C           | CFDSKTEILTEAGHRDFCVTPNHWMYVKVYCVNVTNHVVFVRAAWCGQC   |    |    |    |    |    |
| Tye_RNR_1T1C            | CYSSDTQVLTYSGLDLLVTPNHRMLVKVYCVVNPHTLYVKACWCGNS     |    |    |    |    |    |
| StP_Twort_T1P           | CISMDSMILTTEGGIELVNTYNHPLLVPPTFDVCMCKTHSFINTIVNHNT  |    |    |    |    |    |
| SoP_SO1_dpol_T1P        | CLHRHTQVLTNGGVDGVLMTEDHKILTPVYDLIDEDGNRFLGFLVAHNC   |    |    |    |    |    |
| SaP_SETP12_dpol_T1P     | CLHRHTQVLTGVDGVLMTEDHKILTPVYDLIDEDGNRFLGFLVAHNC     |    |    |    |    |    |
| SaP_SETP3_Helicase_T1P  | CLKRGTEVIMFDGGESYTVNESHILSLGVDDYFGDGDSTRFLFTVTHNTS  |    |    |    |    |    |
| SaP_SETP5_dpol_T1P      | CLHRHTQVLTGVDGVLMTEDHKILTPVYDLIDEDGNRFLGFLVAHNC     |    |    |    |    |    |
| SaP_SETP3_dpol_T1P      | CLHRHTQVLTGVDGVLMTEDHKILTPVYDLIDEDGNRFLGFLVAHNC     |    |    |    |    |    |
| MP_KBG_gp53_T1CP        | CSWTNARAVTRRGEINATITANHRVVGEVWCLRVPNGRFFIKIHLTGNS   |    |    |    |    |    |
| MP_U2_gp50_T1CP         | CSWTNARAVTRRGEINATITANHRVVGEVWCLRVPNGRFFIKIHLTGNS   |    |    |    |    |    |
| MP_Be_gp51_T1CP         | CSWTNARAVTRRGEINATITANHRVVGEVWCLRVPNGRFFIKIHLTGNS   |    |    |    |    |    |
| Mca_MupF_T1P            | CFPAETPVRAAARGHRLTLTANHPVLTHVYDFETETGLIMAGGVIVHNC   |    |    |    |    |    |
| LP_PhiHSIC_Helicase_T1P | CHAYGHDIMMSDGYIRSSSTFKHRSKLGVDYDGDHLYLDFVRHHNC      |    |    |    |    |    |
| LLP_KSY1_PolA_T1CP      | CFSGDTEILTPYGVYEDTNTSIHATGNDVYCVNV-PTHNIVKVISIQGNC  |    |    |    |    |    |
| CbP_D1873_RNR_T1CP      | CFDGQOKTLTKSSNKEILLVTEHDHINVTYVYCFEMIEEYPFTNGVITHNC |    |    |    |    |    |
| CP_P1201_Thy1_T1CP      | CYSSDTEVLTSSEGGVDLLVTPNHKMLATVYCATVPNHTLYVPVWSSGNS  |    |    |    |    |    |
| CbP_Cst_RNR_T1CP        | CFDGQOKTLTKSSNKEILLVTEHDHINVTYVYCFENIEEYPFTNGIITHNC |    |    |    |    |    |
| BsuP_SPBc2_T1P          | CVTGETLLLLTENGGYEIRATEWHKFYVDVYDTTQEDYHSLINGIVTGNC  |    |    |    |    |    |
| AP_APSE5_dpol_T1P       | CLAKGTLVLTITGAYGVGMTADHQVLTEVYDLINGPRNRVFGPLIVHNC   |    |    |    |    |    |
| AP_Aaphi3_MupF_T1CP     | CFPGQSELKGLPRGTVLLATPNHPILTQASCHIYQTVSGYYNSVVFVSN   |    |    |    |    |    |
| AP_APSE4_dpol_T1P       | CLAKGTLVLTITGAYGVGMTADHQVLTEVYDLINGPRNRVFGPLIVHNC   |    |    |    |    |    |
| AP_APSE2_dpol_T1P       | CLAKGTLVLTITGAYGVGMTADHQVLTEVYDLINGPRNRVFGPLIVHNC   |    |    |    |    |    |
| AP_APSE1_dpol_T1P       | CLAKGTLVLTITGAYGVGMTADHQVLTEVYDLINGPRNRVFGPLIVHNC   |    |    |    |    |    |
| AgP_S1249_MupF_T1CP     | CFPGQSELKGLPRGTVLLATPNHPILTQASCHIYQTVSGYYNSVVFVSN   |    |    |    |    |    |
| CIV_RIR1_T1V            | CVAPETMILTEDGGCTLSCTPEHKFIIRVDDTYCFTEPINHNGILTGQC   |    |    |    |    |    |
| APMV_Pol_T1V            | SVTGDTPIITRHQTGCIDVTEDHSLLDYVYDLETESGSFHAGEMIVKNT   |    |    |    |    |    |
| HaV01_Pol_T1V           | SVTKETPLMLRTMNGYVEVTEHDHSLISYVYDVETEDGIFHAGEIIVKNT  |    |    |    |    |    |
| WIV_RIR1_T1V            | CVVGETLILTEGGIFIVCTEYHRFLVNTYCFTEQLNAGVNGILTNSC     |    |    |    |    |    |
| CZIV_RIR1_T1V           | CVVGETLVLTQNGGTSI ICTPYHNFSLDITYCFSEPLNAGVNGILTGC   |    |    |    |    |    |

CV\_NY2A\_RIR1\_T1V  
IIV6\_RIR1\_T1V  
CP\_P1201\_Thy1\_T1P  
Bse\_MLS10\_TerA\_T3  
Ama\_MADE823\_T3  
Cth\_27405\_TerA\_T3  
Cth-DSM2360\_TerA\_T3  
Bvi\_IcmO\_T3  
Ckl\_PTerm\_T3  
Dra\_ATCC13939\_Snf2\_T3  
ShP\_Sfv5\_Primase\_T3  
EP\_Min27\_Primase\_T3  
Mex\_Trbc\_T3  
MP\_Catera\_gp206\_T3  
PP\_PhiEL\_Helicase\_T3  
PP\_PhiEL\_ORF11\_T3  
PP\_PhiEL\_ORF39\_T3  
PP\_PhiEL\_ORF40\_T3  
Sav\_RecG\_Helicase\_T3  
MleTN\_DnaB\_T3  
Mav35712\_DnaB\_T3  
Min1442\_DnaB\_T3  
Msm\_DnaB1\_T3  
MP\_McJw\_DnaB\_T3f  
MP\_Omega\_DnaB\_T3e  
MP\_Be\_DnaB\_T3d  
MavPT\_DnaB\_T3  
PospJS666\_DnaB\_T3  
BcePC184\_DnaB\_T3  
NspJS614\_DnaB\_T3  
MspMCS\_DnaB\_T3  
MflPYRGCK\_DnaB\_T3  
Mvan\_DnaB\_T3  
MspKMS\_DnaB\_T3  
Fal\_DnaB\_T3  
Mav104\_DnaB\_T3  
MgiPYRGCK\_DnaB\_T3  
Pnuc\_DnaB\_T3  
Mav25291\_DnaB\_T3  
RerSK121\_DnaB\_T3  
CflDSM20109\_DnaB\_T3  
KflDSM17836\_DnaB\_T3  
Ppu\_DnaB\_T1a\_1  
Ssp\_DnaB\_T1a\_1  
Rma\_DnaB\_T1a\_1  
MtuH37Rv\_DnaB\_T1a  
Gth\_DnaB\_T1a  
Msm\_DnaB2\_T1a  
Npu\_DnaB\_T1a  
MtuCDC1551\_DnaB\_T1a  
NspPCC7120\_DnaB\_T1a  
MboAF2122\_DnaB\_T1a  
CbuRSA493\_DnaB\_T1c  
Ter\_DnaB1\_T1b  
Ter\_DnaB2\_T1a  
Gvi\_DnaB\_T1b  
Cwa\_DnaB\_T1b  
Nfa\_DnaB\_T1a  
Dge\_DnaB\_T1b  
Kra\_DnaB\_T1a  
Sru\_DnaB\_T1b

CVAGDTKILTSSGGTELRCPTYPHKFYIDTYCFNEPKRHMVGVTGGQC  
CVAPETMILTEDGGCTLSCTPEHKFIIRVDDTYCFTEPINHNGILTGQC  
CYSSDTEVLTSSEGGVLLVTPNHKMLATVYCATVPNHTLYVPVWSSGNS  
QLALDTP IPTPDGGQSIVAGERHLWQVKMRCIQVSPSRLYLSMIPTHNS  
NIAHSTPVL TANRGEKIRCHANHEWTVKGHCIQVSPDGLYLKLVATHNS  
QLALDTP IPTPDGGTSIVAGERHLWKVKMRCIQVSPSRLYLSMIPTHNS  
QLALDTP IPTPDGGSSIIAGARHLWKVPMRCIQVSPSRQYLSMVP THNS  
PQPLHSLVRMADGGRSVEAARVHHWVPPARCLVDEMHCYIHDIVTHNC  
ALDLDTPIDTPTGGEFIIADTEHIWTVPVKCIADVDEKKLYLNHTATHNT  
AQPLDAKVLTP LGGASVEADA EHLWNVPAQCI AVAPDHLYVGYIVTHNT  
ACPLNEPILLADGGRYVDCAGDHLWEVECLCIMVHPRHLYVGYVATHNT  
ACPLNEPILLADGGRYVDCAGDHLWEVECLCIMVHPRHLYVGYVATHNT  
ALPLDALVHTPAGGRTA EACPEHLWEVQAACIRIHPDHLFIDYVVTHTNT  
SLACSTPILTTNGGQEVVTD A EHLWQVPVRCITVHESLSLYVGFVPTHNT  
AMPLSTRVKVPNGGRTADSHPHYHLWKTQETCCIANDEKLYVDYIVTHNT  
QQRNSAKVRI VPKGRATDVGTEHLWTL DCTCIEVNSEQLYLDFIVTHNT  
AGVLSSKIKIPGGGRYTDVSPDHLWKVETQCITIHDPHLYIDFIVTHNS  
MQPLYAKIKVPGGRYTDAGLDHLWKVEAQCISVHPDRLYIDFIVTHNT  
AQPLDSLVLAPTGGSSVECDDEHLWIVPAQCISVHPSHAYVNFTVTHNT  
ALALDTP LPTPTGGTVIVADAQH QWPTPVRCVEVNAAHLYLGMVPTHNS  
ALALDTP LPTPTGGTVIVADAAHQWLTAVRCVEVNDSHMYLAMVPTHNS  
ALALDTP LPTPTGGTVIVADAAHQWLTAVRCVEVNGSHLYLAMVPTHNS  
ALALDTP LPTPSGGTAIVADAQH QWPTPVRCVEVNPEHLYLGMVPTHNS  
ALDVETPILTGNGGAELVADHHLWAVETVCIQIHPSHVFLSLTPHNT  
ALAI DTPILSERGGQTI VADEDHLWTVPTRCITVND SRLYVGFVPTHNT  
PLALNTEVPTPSGGTEITASASHGWTTPVKCIGIT EDHLFQSRILTHNT  
ALALDTP LPTPTGGTVIVADAAHQWLTAVRCVEVNDSHMYLAMVPTHNS  
AQPLDARVRTRTGGRSTECCA EHLWQVLCQCISVHPSKLYIQDVVTHNT  
AQPLDARVRTLTGGRSAECCDEHLWC VATQCISVHPSRLYVDYVVTHTNT  
ALALDTALPTPSGGSRI VADAQH QWLT PVRCVEVNTEHLYLSMIPTHNS  
ALALDTP LPTPDGGTVIVADAQH QWLT PVRCVEVNDSHMYLSMVP THNS  
ALALDTP LPTPTGGTVLVADAEHQWLT PVRCVEVNDDHLYLSMIPTHNS  
ALALDTP LPTPTGGTVIVADAEHQWLT PVRCVEVNDDHMYLSMIPTHNS  
ALALDTP LPTPDGGTVIVADAQH QWLT PVRCVEVNDSHMYLSMVP THNS  
ALALGTALPTPTGGSVIVADGQH QWITPVRCVEVSPDHLYLTCIP THNS  
ALALDTP LPTPTGGTVIVADAAHQWLTAVRCVEVNDSHMYLAMVPTHNS  
ALALDTP LPTPTGGTVLVADAEHQWLT PVRCVEVNDDHLYLSMIPTHNS  
AQPLDAKVKTV DGGREAECCDEHLWRVQAQCVSVHPSRTYVDYVVTHTNT  
ALALDTP LPTPTGGTVIVADAAHQWLTAVRCVEVNDSHMYLAMVPTHNS  
ALALDTP LATPSGGTVLVADEQH QWLT PVRCVEVNADHMYLSMVP THNS  
ALALDTP LPTPTGGSTIVADAQH QWATPVRCVEIHQSHLYLAMIPTHNS  
ALALDTP LPTPSGGTTLVADAEHQWVVPVRCVEVNPDHLYLSMVP THNS  
CISKFSHIMWVSHVEKYLELTSNHKILT NVFDFAANP IPNF INNI IVHNS  
CISGDSLISLASTGRTIKATANHRFLTEVFDLTVPGPHNFVNDI IVHNS  
CLAGDTLITLADGGRSIRATANHRFLTEVFDLTVPGPHNFVNDI IAHNS  
CLTASTRILRADTGREVEATGSHPFMKHVFDGTVSGTHNFVNGISLHNS  
CLSYATNQPYFLKISVIVSTVEHYVLTNVYDFWIKTNNFVNALLVHNS  
CMTANTRILRADTGREVEATANHPFLTDVYDGTVPGTHNFVQGISAHNS  
CLAGDSLVTLVDSGRKIRATGNHKFLTEVFDLTVPGLHNFVNNI IVHNS  
CLTASTRILRADTGREVEATGSHPFMKHVFDGTVSGTHNFVNGISLHNS  
CLTGDSLVTLAPGGCKIRATANHKFLTEVFDLTVPGLHNF INNIIVHNS  
CLTASTRILRADTGREVEATGSHPFMKHVFDGTVSGTHNFVNGISLHNS  
CVTGDTLICLADGGRS IKATAEHRLLAEVYDLTVPKYASWLDG VVSHNS  
CAAYDTLV LQKDGGRFVETTITHPFLTQVYDLTVPE THNFVNDICLHNT  
CLTGESLICLADGGKIRATANHPFFSEVFDLTVPGLHNFVNEIIVHNS  
CCAADTP IADPVTGREVKTTLTHPYLTQVYDLTVPVTHNFVADICLHNT  
CLATNSEIILADGGRYIETTLTHPYLTQVYDLTI PKTHNFVNDICVHNT  
CLPASTRILRADTGREVEATGNHPFLTDVYDGTVPGTHNFVQGISVHNS  
CVTADTLIDVPGTGRVETTPHHPFLGQVYDLTVPGDANFIADICLHNT  
CLTAGTRVLRADTGKTVRATANHPFLTQVYDATV LGGHNFVDGIAVHNS  
CLGKGT PVMYDGGMDYRVNESHILSLVGDYFGFDGNGRFLDGTVTHNT

|                        |                                                    |
|------------------------|----------------------------------------------------|
| SspJA2_DnaB_T1a        | CLAGDTQVMDADRNF SIRATGNHPFLTPVYDIEMPRHHNFVNGLLVHNS |
| Aeh_DnaB1_T1b          | CIMAGSRLVDPRTGREIATTLTHPFLTQVYDLTVDGTHNFVEDVCVHNT  |
| Aeh_DnaB2_T1c          | CVTGDTRVLLADGGRTIRCTPEHRLRGEVFDLTVPGNACWLDGIVSHNS  |
| ArspFB24_DnaB_T1h      | GLALDTPIPAPKGGTSLVASDGNLWQALVRGIRVTKDSLFOGCQLTHNT  |
| Pye_DnaB_T1a           | CISKFNLYQTSLYGKYIQLTSNHKLLTIVFDLECKPLCNFINNFIVHNS  |
| Mbo1173P_DnaB_T1a      | CLTASTRILRADTGREVEATGSHPFMKHVFDGTVSGTHNFVNGISLHNS  |
| Hha1_DnaB_T1b          | CLAYDAEIVQADGGRIETTLTHPFLTQVYDLTIPETHNFINDVCVHNT   |
| SuspNBC_DnaB_T1b       | CLGKGTNVLMDYGGIDYRVNKSILSLVEYDKV-DDYYGFVDMTVTHNT   |
| Mtu37HRa_DnaB_T1a      | CLTASTRILRADTGREVEATGSHPFMKHVFDGTVSGTHNFVNGISLHNS  |
| MtuF11_DnaB_T1a        | CLTASTRILRADTGREVEATGSHPFMKHVFDGTVSGTHNFVNGISLHNS  |
| MaerNIES843_DnaB_T1a   | CLAGDSLVELAAPGRTIRATANHKFLTEVYDLTVDKLHNF INNIIVHNS |
| BceMCO3_DnaB_T3        | AQPLDARVRTLTGGRSAECCDEHLWCVATQCISVHPSRLYVDYVVTHNT  |
| Cbu_Dugway_DnaB_T1c    | CVTGDTLICLADGGRSIKATAEHRLLAEVYDLTVPKYASWLDGVVSHNS  |
| Cbu_RSA334_DnaB_T1c    | CVTGDTLICLADGGRSIKATAEHRLLAEVYDLTVPKYASWLDGVVSHNS  |
| Cbu_Goat_DnaB_T1c      | CVTGDTLICLADGGRSIKATAEHRLLAEVYDLTVPKYASWLDGVVSHNS  |
| Sare_DnaB_T1a          | CLTADTRLIRADTGTKHIDATSNHPFLADV DATVLGTHNFINGIATHNS |
| Mtu_Haarlem_DnaB_T1a   | CLTASTRILRADTGREVEATGSHPFMKHVFDGTVSGTHNFVNGISLHNS  |
| CspPCC7425_DnaB_T1a    | CLTGDSLITLADTGRAIRATGNHKFLTDFVFDLTVPEHHNFVNNIIVHNS |
| RmaDSM4252_DnaB_T1a    | CLAGDTLITLADGGRSIRATANHRFLTEVFDLTVPGPHNFVNDIIAHNS  |
| Pho_Pol_II_T1          | CFPGDTRILVQINGSSFETTVDHPVLVVFVSLNAKKYHTVIENIVTHQC  |
| Pab_Pol_II_T1          | CFPGDTRILVQIDGRSFETTVDHPVLVVFVSLNAKKYHNVIENIVTHQC  |
| Hsp_NRC1_Pol_II_T1     | CFHPETNVWFRDEGRELTVPDHSMRRTYSLTV-AETNTLNGLFTGQC    |
| Tko_Pol_II_T1          | CFPGDTRILVQINGRSFETTVDHPVLVVFVSLNAKKYHNVIESIVTHQC  |
| Nph_PolB1_T1           | CFSGDTDVATPDGTHDFKVTENHRFLLEDHGDVITAEDNHHLQWVGQS   |
| Sru_PolBc_T1           | CFDPETEVTVDGHTDFLVTNHRFLTVDYDGMILTVADNHKFNWTGQS    |
| Nsp_JS614_TOPRIM_T1WCT | CLAGETKVLTWDRKELFATDGRWFVEVYCAEVEDGHAF'DNILTGN     |
| Tfus_RecA1_T1          | CLTADTYVWTD RGGQVTVTRNHPLRVPTFDLMVPRTHSFLNGILSHNT  |
| Tfus_RecA2_T1          | CMHYDTLVTLADGGAQFTATPNHLIRTRKFDIEVEGNHNYFDGVMVHNS  |
| Tfus_Tfu2914_T1WCT     | CVDEETEILTTDGTSSLTTPQHRWPVRVWCVRTPNATWLATVYFTGNS   |

**Supplemental Table 1.** Intein Blocks A, B, F and G were concatenated to produce a single

49 amino acid sequence for each of 148 inteins. Due to the variable size of Block F, only the first and last 7 positions of Block F were used. A dash indicates the absence of an amino acid at that position. Intein names are defined in the InBase database (<http://www.neb.com/neb/inteins.html>)

(14) with the following additional suffixes: T1, Class 1 intein, T3, Class 3 intein; P, phage or prophage intein; V, viral intein; T1a, DnaB Class 1 intein present at the DnaB-a insertion site; T1b, DnaB Class 1 intein present at the DnaB-b insertion site; T1c, DnaB Class 1 intein present at the DnaB-c insertion site; T1d, DnaB Class 1 intein present at the DnaB-d insertion site; T1e, DnaB Class 1 intein present at the DnaB-e insertion site; T1f, DnaB Class 1 intein present at the DnaB-f insertion site; T1h, DnaB Class 1 intein present at the DnaB-h insertion site; T1C, Class 1 intein with CysF:4; T1CP, Class 1 intein from a phage or prophage that has CysF:4; T1WCT, Class 1 intein with the WCT motif.
