# Supplementary material
Source: PubMed Central journal article supplement (PMC3133030)

1 **Supplemental Fig. 1.** A phylogenetic tree based on the conserved intein motifs listed in  
2 Supplemental Table 1 was generated using MrBayes (7) in the Geneious software  
3 package. The 148 inteins selected for analysis included all Class 3 inteins, the 2 Class 1  
4 WCT motif inteins, 29 inteins with the WCT motif Cys<sup>F:4</sup> instead of the more common  
5 Asp<sup>F:4</sup> in the absence of the other WCT motif residues, various types of DNA helicase  
6 inteins, and phage, prophage or viral inteins. Probability values at each node are  
7 expressed as consensus support percentages. The scale bar represents 0.3 substitutions  
8 per site. Class 3 inteins are indicated in red, as is the *Arthrobacter species* FB24 DnaB  
9 intein that begins with Gly<sup>1</sup>, but lacks Cys<sup>F:4</sup>. Further biochemical analysis is required to  
10 determine the Class of the *Arthrobacter species* FB24 DnaB intein.

11 Class 1 WCT inteins are indicated in blue. Intein names are defined in the InBase  
12 database (<http://www.neb.com/neb/inteins.html>) (14) with the following additional  
13 suffixes: T1, Class 1 intein, T3, Class 3 intein; P, phage or prophage intein; V, viral  
14 intein; T1a, DnaB Class 1 intein present at the DnaB-a insertion site; T1b, DnaB Class 1  
15 intein present at the DnaB-b insertion site; T1c, DnaB Class 1 intein present at the DnaB-  
16 c insertion site; T1d, DnaB Class 1 intein present at the DnaB-d insertion site; T1e, DnaB  
17 Class 1 intein present at the DnaB-e insertion site; T1f, DnaB Class 1 intein present at the  
18 DnaB-f insertion site; T1h, DnaB Class 1 intein present at the DnaB-h insertion site; T1C,  
19 Class 1 intein with Cys<sup>F:4</sup>; T1CP, Class 1 intein from a phage or prophage that has Cys<sup>F:4</sup>;  
20 T1WCT, Class 1 intein with the WCT motif.

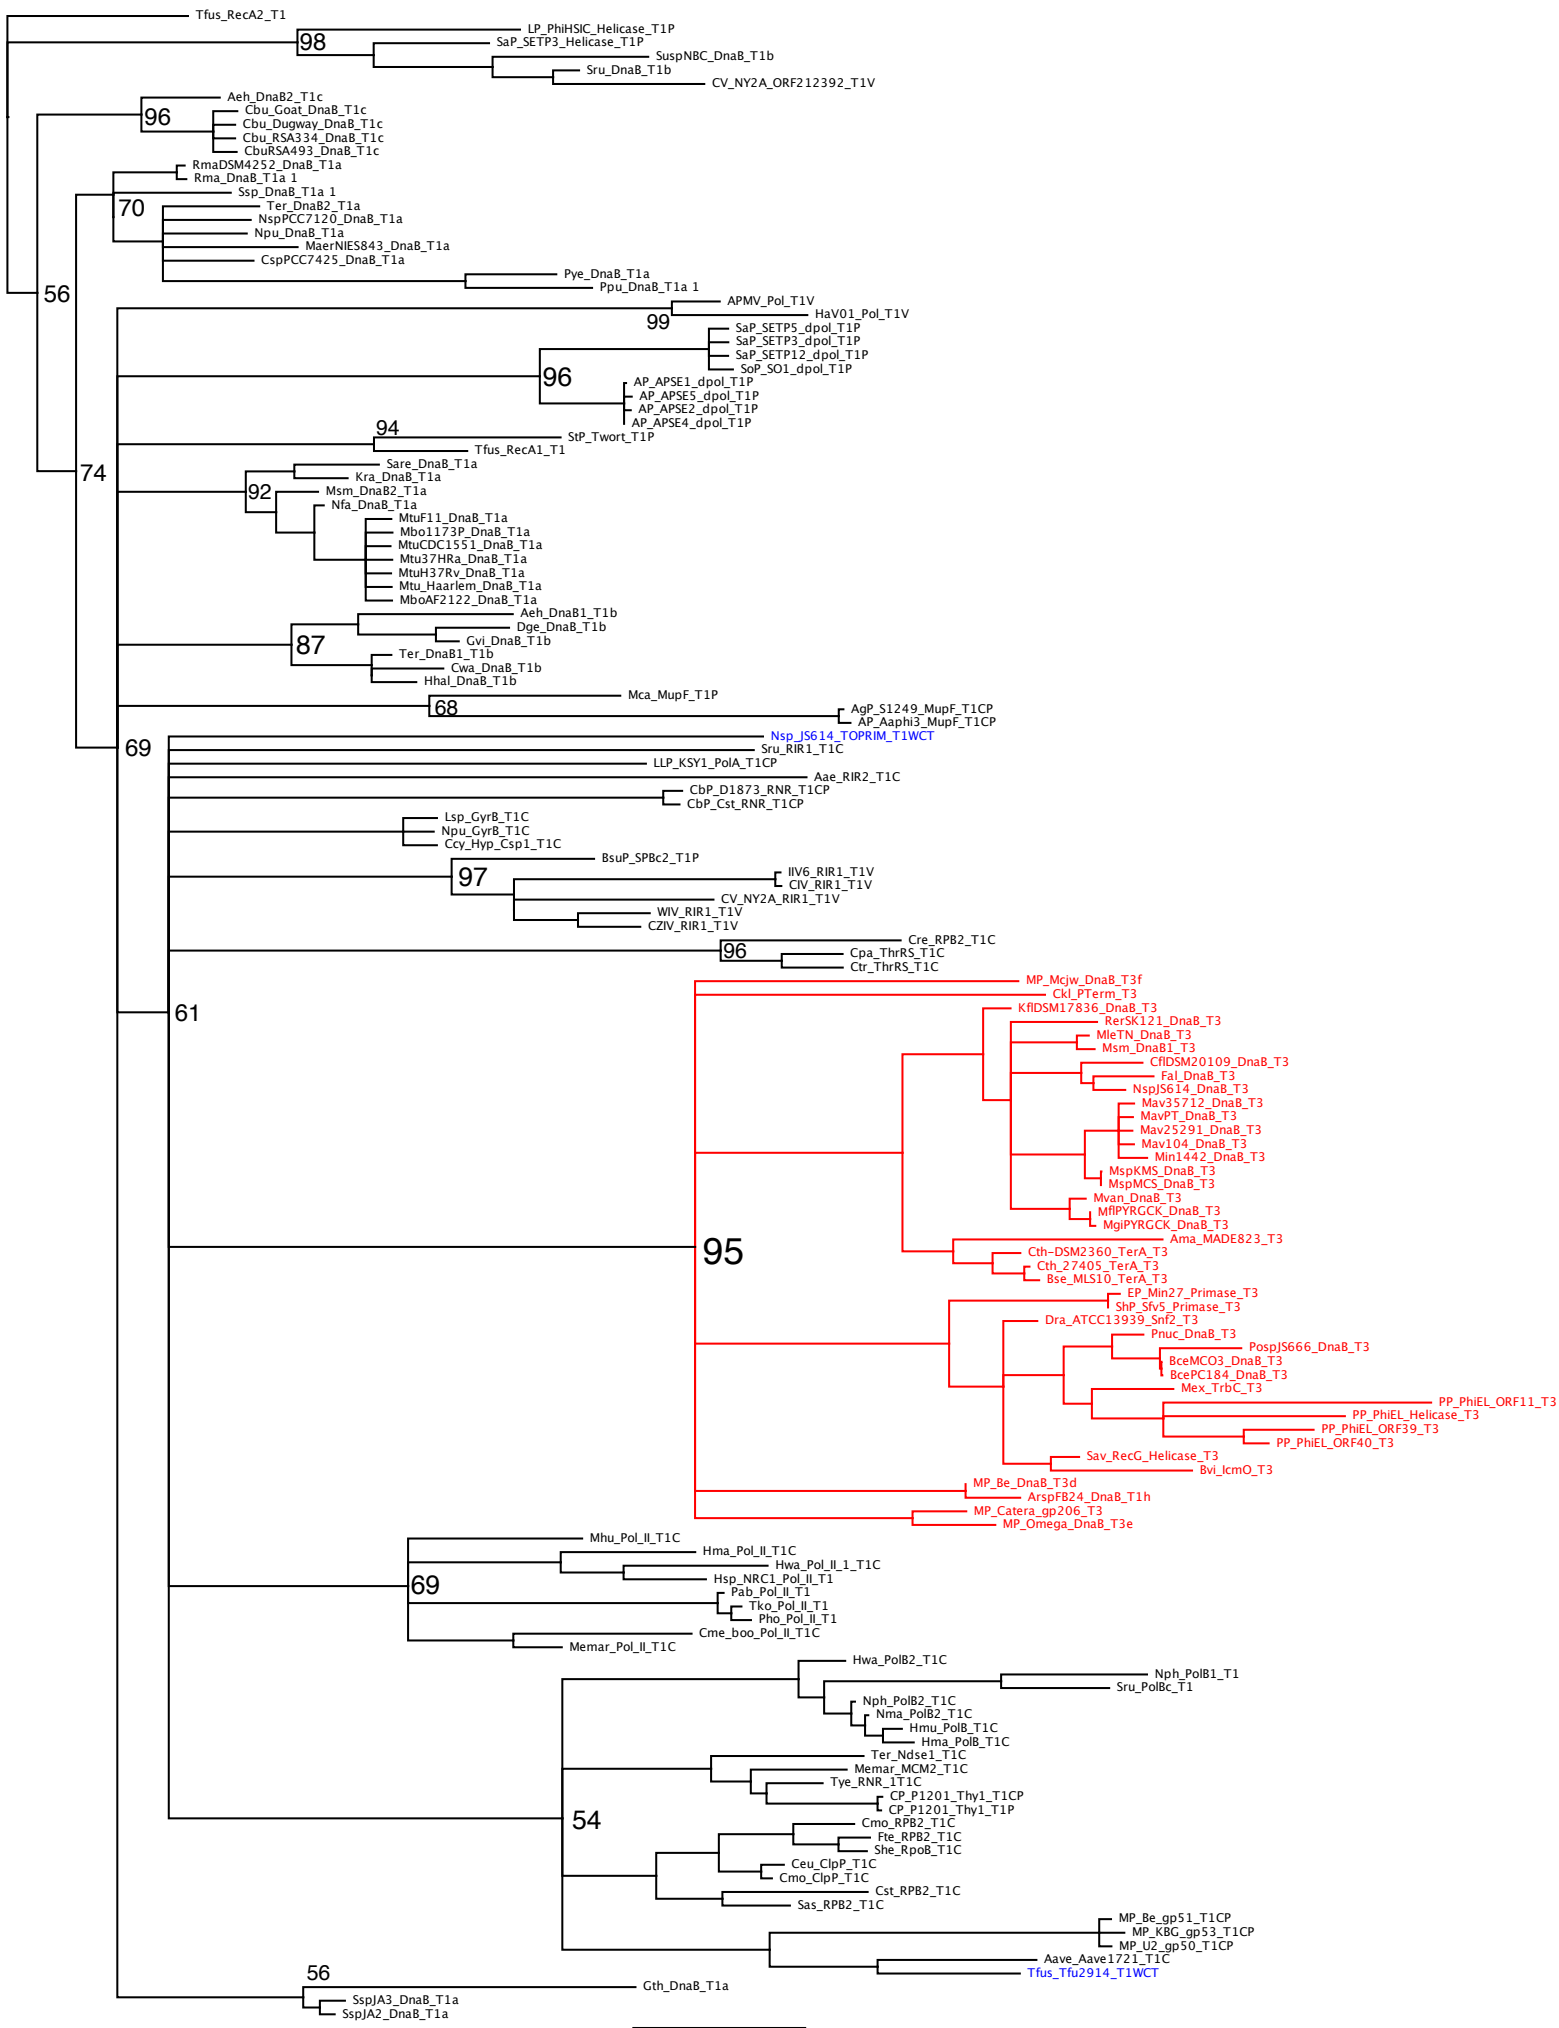

Supplement: supp_193_8_2035__2.pdf [file supp_193_8_2035__2.pdf]
